# Supplementary material for: A colorimetric sensor array for detection and discrimination of antioxidants based on Ag nanoshell deposition on gold nanoparticle surfaces
Source: Royal Society of Chemistry journal article supplement (doi:10.1039/c9an01637f), 2019-01-01
Supplement: c9an01637f1.pdf [file c9an01637f1.pdf]

## Supporting Information

# **Colorimetric Sensor Array for Detection and Discrimination of Antioxidants Based on the Ag Nanoshell Deposition on Gold Nanoparticle Surfaces**

Yanan Li,<sup>1</sup> Qingyun Liu,<sup>2</sup> Zhengbo Chen<sup>1\*</sup>

<sup>1</sup>Department of Chemistry, Capital Normal University, Beijing, 100048, China

<sup>2</sup>College of Chemistry and Environmental Engineering, Shandong University of Science and Technology, Qingdao, 266510, China

## Table of contents

**Figure S1** The structures of six catechins

**Figure S2** UV-Vis absorption spectra of AuNP solutions in different pH values of PBS. Inset: the photographic images corresponding to the UV-Vis absorption spectra. Effect of different pH values of PBS on the absorbance of AuNP solutions at 520 nm. Error bars represent the standard deviation of triplicates.

**Figure S3** UV-Vis absorption spectra of the solution after reaction in the presence of different concentrations of AgNO<sub>3</sub>. Inset: photographic images corresponding to the UV-Vis absorption spectra. Error bars represent the standard deviation of triplicates.

**Figure S4** UV-Vis absorption spectra of the AuNP solution after different reaction time. Inset: photographic images corresponding to the UV-Vis absorption spectra.

**Table S1** The training matrix of the colorimetric response patterns against 6 analytes using this sensor assay at the concentration of 200 μM.

**Table S2** The training matrix of the colorimetric response patterns against 6 analytes using this sensor assay at the concentration of 20 μM.

**Table S3** The training matrix of the colorimetric response patterns against 6 analytes using this sensor assay at the concentration of 2 μM.

**Table S4** The training matrix of the colorimetric response patterns against 6 analytes using this sensor assay at the concentration of 0.2 μM.

**Table S5** The training matrix of the colorimetric response patterns against 6 analytes using this sensor assay at the concentration of 0.02 μM.

**Table S6** The training matrix of the colorimetric response patterns against 6 analytes using this sensor assay at the concentration of 0.01 μM.

**Table S7** The training matrix of the colorimetric response patterns against catechin with different concentrations (200-0.01 μM) using this sensor assay.

**Table S8** The training matrix of the colorimetric response patterns against epicatechin with different concentrations (200-0.01 μM) using this sensor assay.

**Table S9** The training matrix of the colorimetric response patterns against epicatechin 3-gallate with different concentrations (200-0.01 μM) using this sensor assay.

**Table S10** The training matrix of the colorimetric response patterns against epigallocatechin with different concentrations (200-0.01  $\mu\text{M}$ ) using this sensor assay.

**Table S11** The training matrix of the colorimetric response patterns against epigallocatechin 3-gallate with different concentrations (200-0.01  $\mu\text{M}$ ) using this sensor assay.

**Table S12** The training matrix of the colorimetric response patterns against galocatechin with different concentrations (200-0.01  $\mu\text{M}$ ) using this sensor assay.

**Table S13** The training matrix of the colorimetric response patterns against 6 analytes with different concentrations using this sensor assay.

**Table S14.** The training matrix of the colorimetric response patterns against the mixture of GC and EGC at 20  $\mu\text{M}$  and 0.2  $\mu\text{M}$  using this sensor assay.

**Table S15.** The training matrix of the colorimetric response patterns against the mixture of GC, EGC and ECG at 200  $\mu\text{M}$  and 2  $\mu\text{M}$  using this sensor assay.

**Table S16.** The training matrix of the colorimetric response patterns against the 6 analytes at 2  $\mu\text{M}$  with tannic acid (TA) and gallic acid (GA) at 200  $\mu\text{M}$  as potential interferences using this sensor assay.

**Table S17.** The training matrix of the colorimetric response patterns against the 6 analytes at 0.02  $\mu\text{M}$  in serum samples using this sensor assay.

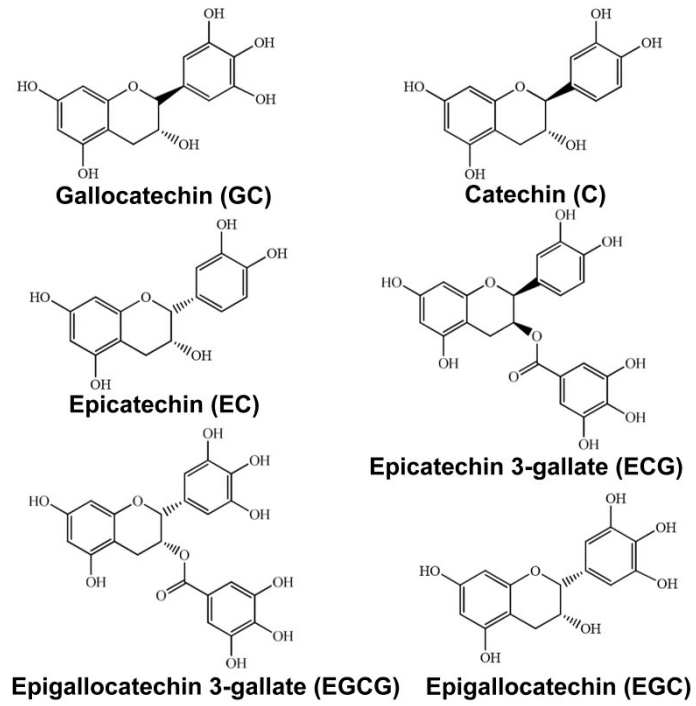

**Figure S1** The structures of six catechins

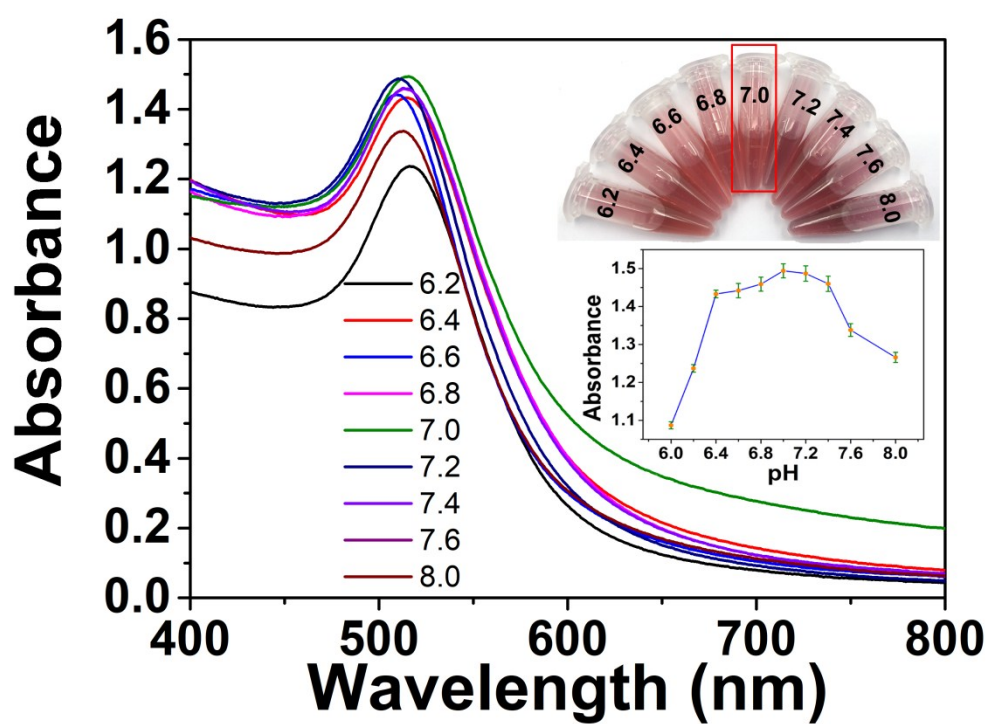

**Figure S2** UV-Vis absorption spectra of AuNP solutions in different pH values of PBS. Inset: the photographic images corresponding to the UV-Vis absorption spectra. Effect of different pH values of PBS on the absorbance of AuNP solutions at 520 nm. Error bars represent the standard deviation of triplicates.

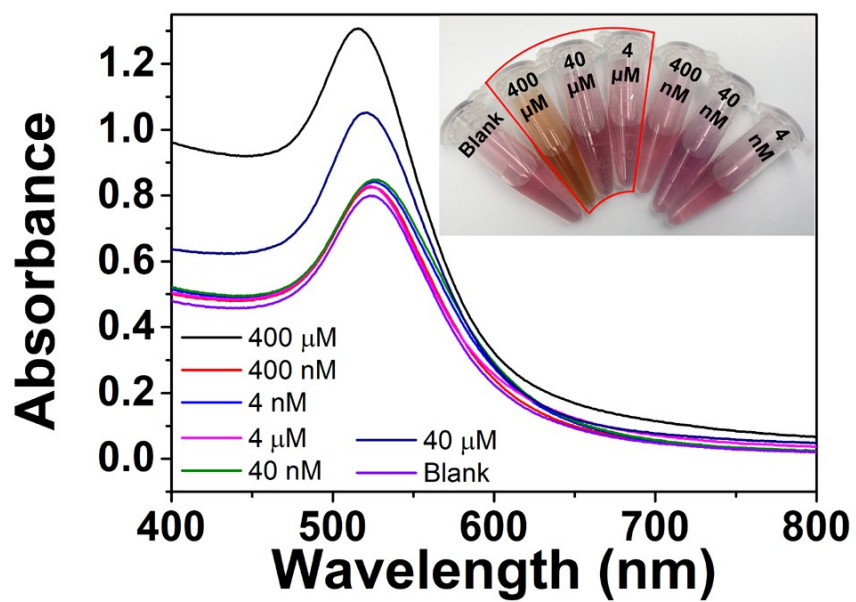

**Figure S3** UV-Vis absorption spectra of the solution after reaction in the presence of different concentrations of AgNO<sub>3</sub>. Inset: photographic images corresponding to the UV-Vis absorption spectra.

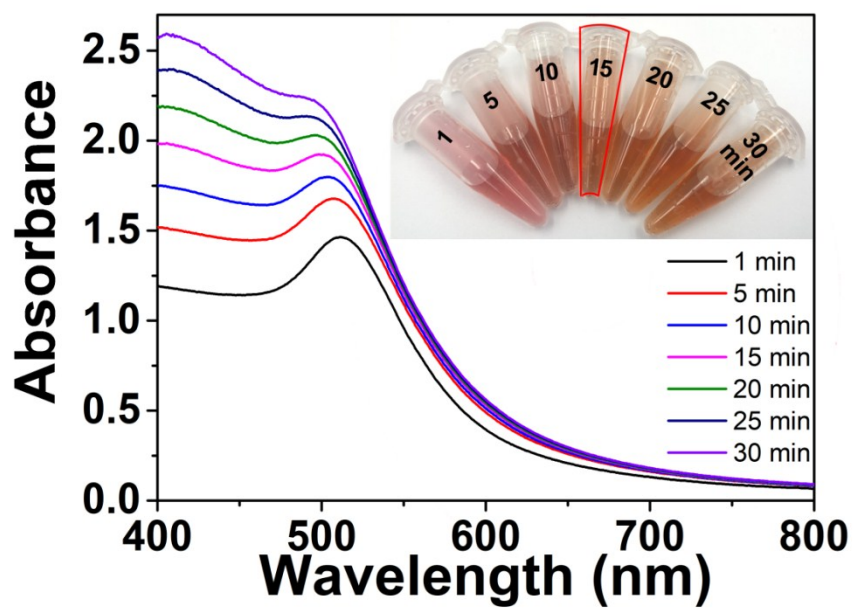

**Figure S4** UV-Vis absorption spectra of the AuNP solution after different reaction time. Inset: photographic images corresponding to the UV-Vis absorption spectra.

**Table S1** The training matrix of the colorimetric response patterns against 6 analytes using this sensor assay at the concentration of 200  $\mu\text{M}$ .

| antioxidants | $\Delta\text{RGB-AgNO}_3$ (400 $\mu\text{M}$ ) | $\Delta\text{RGB-AgNO}_3$ (40 $\mu\text{M}$ ) | $\Delta\text{RGB-AgNO}_3$ (4 $\mu\text{M}$ ) |
|--------------|------------------------------------------------|-----------------------------------------------|----------------------------------------------|
| C            | 93.1933474                                     | 84.74078121                                   | 96.55568342                                  |
| C            | 94.71536306                                    | 84.74078121                                   | 102.2448043                                  |
| C            | 98.39715443                                    | 84.29116205                                   | 93.46657156                                  |
| C            | 87.82368701                                    | 84.43340571                                   | 95.86448769                                  |
| C            | 94.3716059                                     | 85.07643622                                   | 95.25229656                                  |
| EC           | 104.3695358                                    | 130.418557                                    | 82.96384755                                  |
| EC           | 102.2007828                                    | 130.418557                                    | 82.96384755                                  |
| EC           | 104.6279121                                    | 133.7273345                                   | 81.63945125                                  |
| EC           | 106.8316433                                    | 133.7273345                                   | 81.1418511                                   |
| EC           | 106.3014581                                    | 132.5481045                                   | 81.25269226                                  |
| GC           | 94.07443861                                    | 124.4065915                                   | 50.85272854                                  |
| GC           | 93.32202312                                    | 124.4065915                                   | 48.64154603                                  |
| GC           | 88.26097665                                    | 120.9504031                                   | 51.56549234                                  |
| GC           | 96.13532129                                    | 122.0696522                                   | 45.09988914                                  |
| GC           | 95.75489544                                    | 119.2224811                                   | 43.30127019                                  |
| EGC          | 121.6593605                                    | 49.52776999                                   | 22.04540769                                  |
| EGC          | 120.9710709                                    | 49.52776999                                   | 29.08607914                                  |
| EGC          | 117.3243368                                    | 42                                            | 25.8069758                                   |
| EGC          | 120.245582                                     | 48.64154603                                   | 19.84943324                                  |
| EGC          | 123.3328829                                    | 49.34571917                                   | 27.5317998                                   |
| EGCG         | 108.6324077                                    | 67.6609193                                    | 106.3437821                                  |
| EGCG         | 104.1201229                                    | 67.6609193                                    | 117.4308307                                  |
| EGCG         | 106.8176015                                    | 67.05967492                                   | 114.952164                                   |
| EGCG         | 110.6842356                                    | 61.29437168                                   | 108.9219904                                  |
| EGCG         | 103.116439                                     | 64.28841264                                   | 110.0999546                                  |
| ECG          | 87.0689382                                     | 77.39509028                                   | 39.42080669                                  |
| ECG          | 88.24964589                                    | 77.39509028                                   | 36.40054945                                  |
| ECG          | 80.61017306                                    | 71.59608928                                   | 34.53983208                                  |
| ECG          | 88.97752525                                    | 55.11805512                                   | 28.37252192                                  |
| ECG          | 85.48099204                                    | 77.12976079                                   | 25.01999201                                  |



**Table S2** The training matrix of the colorimetric response patterns against 6 analytes using this sensor assay at the concentration of 20  $\mu\text{M}$ .

| antioxidants | $\Delta\text{RGB-AgNO}_3$ (400 $\mu\text{M}$ ) | $\Delta\text{RGB-AgNO}_3$ (40 $\mu\text{M}$ ) | $\Delta\text{RGB-AgNO}_3$ (4 $\mu\text{M}$ ) |
|--------------|------------------------------------------------|-----------------------------------------------|----------------------------------------------|
| C            | 18.78829423                                    | 74.71278338                                   | 78.77816956                                  |
| C            | 19.72308292                                    | 74.71278338                                   | 94.64142856                                  |
| C            | 20.54263858                                    | 83.86894539                                   | 88.77499648                                  |
| C            | 28.08914381                                    | 79.4858478                                    | 93.30058949                                  |
| C            | 35.58089375                                    | 81.84741902                                   | 77.69813383                                  |
| EC           | 37.85498646                                    | 75.74958746                                   | 100.8464179                                  |
| EC           | 33.3166625                                     | 75.74958746                                   | 121.893396                                   |
| EC           | 32.75667871                                    | 80.31811751                                   | 114.2278425                                  |
| EC           | 41.15823125                                    | 79.15175298                                   | 114.3940558                                  |
| EC           | 43.56604182                                    | 76.11175993                                   | 103.2521186                                  |
| GC           | 21.9544984                                     | 46.84015371                                   | 7.141428429                                  |
| GC           | 20.14944168                                    | 46.84015371                                   | 14.59451952                                  |
| GC           | 17.49285568                                    | 54.92722458                                   | 22.56102835                                  |
| GC           | 21.56385865                                    | 57.218878                                     | 27.74887385                                  |
| GC           | 30.82207001                                    | 53.1130869                                    | 7.280109889                                  |
| EGC          | 65.38348415                                    | 107.856386                                    | 130.9198228                                  |
| EGC          | 66.46803743                                    | 107.856386                                    | 146.7821515                                  |
| EGC          | 69.07966416                                    | 116.1636776                                   | 143.8540927                                  |
| EGC          | 87.25823743                                    | 119.235062                                    | 155.4027027                                  |
| EGC          | 82.77680835                                    | 114.6123903                                   | 151.211772                                   |
| EGCG         | 54.64430437                                    | 64.96922348                                   | 88.93818078                                  |
| EGCG         | 46.27094121                                    | 64.96922348                                   | 112.2408125                                  |
| EGCG         | 44.56455991                                    | 68.04410334                                   | 104.297651                                   |
| EGCG         | 61.65225057                                    | 53.1130869                                    | 110.5667219                                  |
| EGCG         | 64.76109943                                    | 54.87257967                                   | 106.8316433                                  |
| ECG          | 39.63584237                                    | 90.8735385                                    | 150.7779825                                  |
| ECG          | 37.98683983                                    | 90.8735385                                    | 164.8332491                                  |
| ECG          | 33.76388603                                    | 89.93886813                                   | 162.708328                                   |
| ECG          | 51.53639491                                    | 100.7025322                                   | 170.1087887                                  |
| ECG          | 54.8634669                                     | 102.034308                                    | 162.3637891                                  |

**Table S3** The training matrix of the colorimetric response patterns against 6 analytes using this sensor assay at the concentration of 2  $\mu\text{M}$ .

| antioxidants | $\Delta\text{RGB-AgNO}_3$<br>(400 $\mu\text{M}$ ) | $\Delta\text{RGB-AgNO}_3$ (40<br>$\mu\text{M}$ ) | $\Delta\text{RGB-AgNO}_3$ (4<br>$\mu\text{M}$ ) |
|--------------|---------------------------------------------------|--------------------------------------------------|-------------------------------------------------|
| C            | 20.85665361                                       | 73.83088785                                      | 142.551745                                      |
| C            | 22.56102835                                       | 73.83088785                                      | 133.4953183                                     |
| C            | 27.44084547                                       | 77.57576941                                      | 138.6434275                                     |
| C            | 24.12467616                                       | 88.04544281                                      | 135.9264507                                     |
| C            | 24.75883681                                       | 79.12648103                                      | 135.753453                                      |
| EC           | 11.70469991                                       | 106.6677083                                      | 115.5378726                                     |
| EC           | 13.15294644                                       | 106.6677083                                      | 109.0596167                                     |
| EC           | 11.5758369                                        | 112.5833025                                      | 104.6374694                                     |
| EC           | 14.96662955                                       | 110.9594521                                      | 100.4838295                                     |
| EC           | 15.39480432                                       | 116.6619047                                      | 106.6489569                                     |
| GC           | 19.41648784                                       | 130.8357749                                      | 217.8302091                                     |
| GC           | 10.95445115                                       | 130.8357749                                      | 199.8824655                                     |
| GC           | 12.32882801                                       | 142.846071                                       | 206.7099417                                     |
| GC           | 8.366600265                                       | 142.0176045                                      | 202.7658748                                     |
| GC           | 13.15294644                                       | 137.4845446                                      | 205.5358849                                     |
| EGC          | 38.13135193                                       | 136.4001466                                      | 161.2978611                                     |
| EGC          | 40.91454509                                       | 136.4001466                                      | 160.4306704                                     |
| EGC          | 37.60319135                                       | 144.1180072                                      | 157.4198209                                     |
| EGC          | 35.11409973                                       | 144.4333756                                      | 156.4768353                                     |
| EGC          | 38.37968212                                       | 146.2326913                                      | 157.8258534                                     |
| EGCG         | 18.60107524                                       | 31.2409987                                       | 91.26883367                                     |
| EGCG         | 20.80865205                                       | 31.2409987                                       | 93.34880824                                     |
| EGCG         | 21                                                | 34.42382896                                      | 89.18520057                                     |
| EGCG         | 16.40121947                                       | 43.23193264                                      | 84.22588676                                     |
| EGCG         | 22.15851981                                       | 47.96873982                                      | 93.1557835                                      |
| ECG          | 28.16025568                                       | 124.4588285                                      | 196.4942747                                     |
| ECG          | 22.47220505                                       | 124.4588285                                      | 182.8824759                                     |
| ECG          | 28.80972058                                       | 128.351081                                       | 193.7756435                                     |
| ECG          | 26.26785107                                       | 133.8954816                                      | 190.8402473                                     |
| ECG          | 32.09361307                                       | 137.6263056                                      | 194.3038857                                     |

**Table S4** The training matrix of the colorimetric response patterns against 6 analytes using this sensor assay at the concentration of 0.2  $\mu\text{M}$ .

| antioxidants | $\Delta\text{RGB-AgNO}_3$<br>(400 $\mu\text{M}$ ) | $\Delta\text{RGB-AgNO}_3$ (40<br>$\mu\text{M}$ ) | $\Delta\text{RGB-AgNO}_3$ (4<br>$\mu\text{M}$ ) |
|--------------|---------------------------------------------------|--------------------------------------------------|-------------------------------------------------|
| C            | 11.5758369                                        | 93.62691921                                      | 83.36066219                                     |
| C            | 15.16575089                                       | 93.62691921                                      | 79.93122043                                     |
| C            | 10.77032961                                       | 98.23441352                                      | 86.79285685                                     |
| C            | 5.196152423                                       | 102.3181313                                      | 81.64557551                                     |
| C            | 4.123105626                                       | 102.3181313                                      | 91.79324594                                     |
| EC           | 27.09243437                                       | 113.2519316                                      | 130.8778056                                     |
| EC           | 29.03446228                                       | 113.2519316                                      | 134.3167897                                     |
| EC           | 20.0748599                                        | 122.0368797                                      | 136.0367597                                     |
| EC           | 25.03996805                                       | 118.14398                                        | 136.7077174                                     |
| EC           | 21.63330765                                       | 119.8707637                                      | 138.426876                                      |
| GC           | 31.78049716                                       | 115.1824639                                      | 139.9499911                                     |
| GC           | 38.60051813                                       | 115.1824639                                      | 141.665098                                      |
| GC           | 28.39013913                                       | 126.1824076                                      | 139.9499911                                     |
| GC           | 29.84962311                                       | 118.8402289                                      | 138.2353066                                     |
| GC           | 29.84962311                                       | 122.2906374                                      | 148.5294584                                     |
| EGC          | 47.16990566                                       | 77.99358948                                      | 54.88169094                                     |
| EGC          | 52.32590181                                       | 77.99358948                                      | 50.76416059                                     |
| EGC          | 47.16990566                                       | 86.07554821                                      | 59.01694672                                     |
| EGC          | 48.88762625                                       | 77.05193054                                      | 49.2138192                                      |
| EGC          | 42.72001873                                       | 80.50465825                                      | 51.8748494                                      |
| EGCG         | 39.37003937                                       | 99.54898292                                      | 86.44073114                                     |
| EGCG         | 39.37003937                                       | 99.54898292                                      | 93.29523032                                     |
| EGCG         | 35.86084215                                       | 111.1035553                                      | 91.9782583                                      |
| EGCG         | 35.86084215                                       | 100.3244736                                      | 92.62289134                                     |
| EGCG         | 34.10278581                                       | 107.2240645                                      | 100.0099995                                     |
| ECG          | 14.73091986                                       | 108.0601684                                      | 73.60706488                                     |
| ECG          | 19.54482029                                       | 108.0601684                                      | 78.5684415                                      |
| ECG          | 16.673332                                         | 112.9291813                                      | 78.74642849                                     |
| ECG          | 15.39480432                                       | 105.6314347                                      | 76.5049018                                      |
| ECG          | 11.70469991                                       | 115.8533556                                      | 80.28698525                                     |

**Table S5** The training matrix of the colorimetric response patterns against 6 analytes using this sensor assay at the concentration of 0.02  $\mu\text{M}$ .

| antioxidants | $\Delta\text{RGB-AgNO}_3$<br>(400 $\mu\text{M}$ ) | $\Delta\text{RGB-AgNO}_3$ (40<br>$\mu\text{M}$ ) | $\Delta\text{RGB-AgNO}_3$ (4<br>$\mu\text{M}$ ) |
|--------------|---------------------------------------------------|--------------------------------------------------|-------------------------------------------------|
| C            | 28.17800561                                       | 29.58039892                                      | 101.7496929                                     |
| C            | 31.591138                                         | 29.58039892                                      | 98.22932352                                     |
| C            | 28.17800561                                       | 37.80211634                                      | 106.061303                                      |
| C            | 36.5650106                                        | 31.52776554                                      | 110.154437                                      |
| C            | 27.31300057                                       | 33.51119216                                      | 104.1393297                                     |
| EC           | 44.09081537                                       | 46.69047012                                      | 168.2468425                                     |
| EC           | 50.91168825                                       | 46.69047012                                      | 169.7939928                                     |
| EC           | 48.76474136                                       | 50.17967716                                      | 176.5729311                                     |
| EC           | 48.76474136                                       | 43.35896678                                      | 175.6189056                                     |
| EC           | 40.54626987                                       | 50.47771786                                      | 169.7939928                                     |
| GC           | 54.64430437                                       | 47.93745926                                      | 112.7342007                                     |
| GC           | 59.80802622                                       | 47.93745926                                      | 111.9017426                                     |
| GC           | 58.08614293                                       | 57.43692192                                      | 113.6177803                                     |
| GC           | 61.53048025                                       | 58.01723882                                      | 126.313103                                      |
| GC           | 53.93514624                                       | 57.24508713                                      | 119.1091936                                     |
| EGC          | 24.37211521                                       | 62.87288764                                      | 111.3642672                                     |
| EGC          | 25.0998008                                        | 62.87288764                                      | 100.1299156                                     |
| EGC          | 27.67670501                                       | 71.28113355                                      | 108.7244223                                     |
| EGC          | 32.69556545                                       | 62.2655603                                       | 119.2476415                                     |
| EGC          | 26.19160171                                       | 64.79197481                                      | 108.5218872                                     |
| EGCG         | 28.58321186                                       | 24.06241883                                      | 135.3292282                                     |
| EGCG         | 27.12931993                                       | 24.06241883                                      | 130.1537552                                     |
| EGCG         | 34.33656943                                       | 26.70205985                                      | 137.0437886                                     |
| EGCG         | 31.28897569                                       | 20.22374842                                      | 135.5359731                                     |
| EGCG         | 25.67099531                                       | 23.74868417                                      | 136.5650028                                     |
| ECG          | 33.12099032                                       | 33.83784863                                      | 130.6942998                                     |
| ECG          | 36.61966685                                       | 33.83784863                                      | 132.0302996                                     |
| ECG          | 39.12799509                                       | 30.88689042                                      | 136.1212695                                     |
| ECG          | 42.55584566                                       | 32.34192326                                      | 134.3949404                                     |
| ECG          | 35.67912555                                       | 34.59768778                                      | 131.4572174                                     |

**Table S6** The training matrix of the colorimetric response patterns against 6 analytes using this sensor assay at the concentration of 0.01  $\mu\text{M}$ .

| antioxidants | $\Delta\text{RGB-AgNO}_3$<br>(400 $\mu\text{M}$ ) | $\Delta\text{RGB-AgNO}_3$ (40<br>$\mu\text{M}$ ) | $\Delta\text{RGB-AgNO}_3$ (4<br>$\mu\text{M}$ ) |
|--------------|---------------------------------------------------|--------------------------------------------------|-------------------------------------------------|
| C            | 35.86084215                                       | 40.21193853                                      | 3.741657387                                     |
| C            | 32.71085447                                       | 40.21193853                                      | 3.741657387                                     |
| C            | 33.18132005                                       | 20.78460969                                      | 12.88409873                                     |
| C            | 34.36568055                                       | 30.7408523                                       | 17.97220076                                     |
| C            | 32.04684072                                       | 32.38826948                                      | 11.18033989                                     |
| EC           | 39.69886648                                       | 60.58052492                                      | 78.09609465                                     |
| EC           | 40.16217126                                       | 60.58052492                                      | 69.45502142                                     |
| EC           | 39.10242959                                       | 41.59326869                                      | 76.69419796                                     |
| EC           | 37.20215048                                       | 51.28352562                                      | 77.23341246                                     |
| EC           | 36.81032464                                       | 41.64132563                                      | 71.53320907                                     |
| GC           | 33.76388603                                       | 64.69157596                                      | 83.71379815                                     |
| GC           | 30.6757233                                        | 64.69157596                                      | 64.76109943                                     |
| GC           | 38.8458492                                        | 53.16013544                                      | 82.23138087                                     |
| GC           | 40.64480287                                       | 53.16013544                                      | 77.69813383                                     |
| GC           | 37.69615365                                       | 55.01817881                                      | 78.94935085                                     |
| EGC          | 28.08914381                                       | 36.02776707                                      | 125.7378225                                     |
| EGC          | 24.73863375                                       | 36.02776707                                      | 120.5860688                                     |
| EGC          | 23.08679276                                       | 34.13209633                                      | 128.9689885                                     |
| EGC          | 31.25699922                                       | 25.76819745                                      | 132.4613151                                     |
| EGC          | 26.19160171                                       | 34.0881211                                       | 127.9687462                                     |
| EGCG         | 36.7151195                                        | 59.87486952                                      | 59.41380311                                     |
| EGCG         | 38.44476557                                       | 59.87486952                                      | 55.14526272                                     |
| EGCG         | 34.11744422                                       | 52.64028875                                      | 58.83026432                                     |
| EGCG         | 39.87480407                                       | 64.28841264                                      | 73.17103252                                     |
| EGCG         | 33.91164992                                       | 60.11655346                                      | 64.41273166                                     |
| ECG          | 3.16227766                                        | 83.43860018                                      | 75.2861209                                      |
| ECG          | 10.39230485                                       | 83.43860018                                      | 73.25298629                                     |
| ECG          | 6.403124237                                       | 49.81967483                                      | 83.89278872                                     |
| ECG          | 8.774964387                                       | 55.57877293                                      | 82.92767934                                     |
| ECG          | 8.774964387                                       | 57.84461946                                      | 77.3369252                                      |

**Table S7** The training matrix of the colorimetric response patterns against catechin with different concentrations (0.01-200  $\mu\text{M}$ ) using this sensor assay.

| antioxidants       | $\Delta\text{RGB-AgNO}_3$<br>(400 $\mu\text{M}$ ) | $\Delta\text{RGB-AgNO}_3$ (40<br>$\mu\text{M}$ ) | $\Delta\text{RGB-AgNO}_3$ (4<br>$\mu\text{M}$ ) |
|--------------------|---------------------------------------------------|--------------------------------------------------|-------------------------------------------------|
| 200 $\mu\text{M}$  | 73.27346041                                       | 29.69848481                                      | 47.29693436                                     |
| 200 $\mu\text{M}$  | 81.25884567                                       | 29.69848481                                      | 40.37325848                                     |
| 200 $\mu\text{M}$  | 82.72242743                                       | 29.69848481                                      | 41.32795664                                     |
| 200 $\mu\text{M}$  | 71.07038764                                       | 26.43860813                                      | 39.63584237                                     |
| 200 $\mu\text{M}$  | 74.73285757                                       | 29.30870178                                      | 44.72135955                                     |
| 100 $\mu\text{M}$  | 68.5273668                                        | 32.32645975                                      | 32.07802986                                     |
| 100 $\mu\text{M}$  | 75.06663706                                       | 32.32645975                                      | 18.05547009                                     |
| 100 $\mu\text{M}$  | 76.75936425                                       | 29.79932885                                      | 25.15949125                                     |
| 100 $\mu\text{M}$  | 68.5273668                                        | 34.2636834                                       | 23.70653918                                     |
| 100 $\mu\text{M}$  | 69.92853495                                       | 30.23243292                                      | 22.69361144                                     |
| 20 $\mu\text{M}$   | 63.33245613                                       | 17.60681686                                      | 41.88078318                                     |
| 20 $\mu\text{M}$   | 59.49789912                                       | 17.60681686                                      | 31.25699922                                     |
| 20 $\mu\text{M}$   | 66.36264009                                       | 18.81488772                                      | 35.52463934                                     |
| 20 $\mu\text{M}$   | 61.13100686                                       | 18                                               | 29.59729717                                     |
| 20 $\mu\text{M}$   | 63.82005954                                       | 24.39262184                                      | 31.84336666                                     |
| 10 $\mu\text{M}$   | 54.41507144                                       | 21.47091055                                      | 25.88435821                                     |
| 10 $\mu\text{M}$   | 52.35456045                                       | 21.47091055                                      | 14.17744688                                     |
| 10 $\mu\text{M}$   | 62.3217458                                        | 10.39230485                                      | 28.65309756                                     |
| 10 $\mu\text{M}$   | 62.31372241                                       | 22.04540769                                      | 18.81488772                                     |
| 10 $\mu\text{M}$   | 63.182276                                         | 18.05547009                                      | 23.70653918                                     |
| 2 $\mu\text{M}$    | 37.49666652                                       | 47.04253395                                      | 45.04442252                                     |
| 2 $\mu\text{M}$    | 35.24202037                                       | 47.04253395                                      | 36.52396474                                     |
| 2 $\mu\text{M}$    | 42.07136794                                       | 42.53234064                                      | 39.20459157                                     |
| 2 $\mu\text{M}$    | 34.0881211                                        | 45.97825573                                      | 31.33687923                                     |
| 2 $\mu\text{M}$    | 32.83291032                                       | 46.27094121                                      | 40.02499219                                     |
| 0.02 $\mu\text{M}$ | 27.31300057                                       | 36.72873534                                      | 34.82814953                                     |
| 0.02 $\mu\text{M}$ | 25.0998008                                        | 36.72873534                                      | 26.41968963                                     |
| 0.02 $\mu\text{M}$ | 31.84336666                                       | 32.26453161                                      | 29                                              |
| 0.02 $\mu\text{M}$ | 23.9582971                                        | 35.86084215                                      | 22.13594362                                     |
| 0.02 $\mu\text{M}$ | 22.6715681                                        | 36.06937759                                      | 29.89983278                                     |
| 0.01 $\mu\text{M}$ | 18.38477631                                       | 19.41648784                                      | 15.84297952                                     |
| 0.01 $\mu\text{M}$ | 7.348469228                                       | 19.41648784                                      | 25.49509757                                     |
| 0.01 $\mu\text{M}$ | 18.62793601                                       | 16.03121954                                      | 22.56102835                                     |
| 0.01 $\mu\text{M}$ | 17.57839583                                       | 21.9317122                                       | 22.5166605                                      |
| 0.01 $\mu\text{M}$ | 19.5192213                                        | 25.3179778                                       | 17.3781472                                      |

**Table S8** The training matrix of the colorimetric response patterns against epicatechin with different concentrations (0.01-200  $\mu\text{M}$ ) using this sensor assay.

| antioxidants       | $\Delta\text{RGB-AgNO}_3$<br>(400 $\mu\text{M}$ ) | $\Delta\text{RGB-AgNO}_3$ (40<br>$\mu\text{M}$ ) | $\Delta\text{RGB-AgNO}_3$ (4<br>$\mu\text{M}$ ) |
|--------------------|---------------------------------------------------|--------------------------------------------------|-------------------------------------------------|
| 200 $\mu\text{M}$  | 116.1981067                                       | 80.09993758                                      | 95.1209756                                      |
| 200 $\mu\text{M}$  | 114.4945414                                       | 80.09993758                                      | 75.49834435                                     |
| 200 $\mu\text{M}$  | 112.0803283                                       | 87.96021828                                      | 89.54328562                                     |
| 200 $\mu\text{M}$  | 111.1890282                                       | 82.66196223                                      | 84.12490713                                     |
| 200 $\mu\text{M}$  | 111.0900536                                       | 80.09993758                                      | 110.1725919                                     |
| 100 $\mu\text{M}$  | 90.47651629                                       | 101.0544408                                      | 129.7304899                                     |
| 100 $\mu\text{M}$  | 85.51608036                                       | 101.0544408                                      | 113.7980668                                     |
| 100 $\mu\text{M}$  | 93.39700209                                       | 102.0637056                                      | 123.0690863                                     |
| 100 $\mu\text{M}$  | 88.75246475                                       | 91.83136719                                      | 120.6896847                                     |
| 100 $\mu\text{M}$  | 92.13576938                                       | 91.32360045                                      | 152.6237203                                     |
| 20 $\mu\text{M}$   | 68.19824045                                       | 75.70336849                                      | 128.9767421                                     |
| 20 $\mu\text{M}$   | 63.2455532                                        | 75.70336849                                      | 111.6825859                                     |
| 20 $\mu\text{M}$   | 70.71067812                                       | 80.72793816                                      | 123.2112008                                     |
| 20 $\mu\text{M}$   | 63.00793601                                       | 80.56674252                                      | 124.040316                                      |
| 20 $\mu\text{M}$   | 63.2455532                                        | 76.4852927                                       | 148.4419078                                     |
| 10 $\mu\text{M}$   | 61.32699243                                       | 58.48931526                                      | 114.4814395                                     |
| 10 $\mu\text{M}$   | 56.5154846                                        | 58.48931526                                      | 108.692226                                      |
| 10 $\mu\text{M}$   | 61                                                | 60.77005842                                      | 114.5600279                                     |
| 10 $\mu\text{M}$   | 55.61474625                                       | 56.30275304                                      | 111.7362967                                     |
| 10 $\mu\text{M}$   | 59.8414572                                        | 55.47071299                                      | 134.3354011                                     |
| 2 $\mu\text{M}$    | 48.61069841                                       | 56.0178543                                       | 161.5518493                                     |
| 2 $\mu\text{M}$    | 47.07440918                                       | 56.0178543                                       | 83.13843876                                     |
| 2 $\mu\text{M}$    | 52.23983155                                       | 59.14389233                                      | 92.40129869                                     |
| 2 $\mu\text{M}$    | 44.39594576                                       | 52.48809389                                      | 88.41379983                                     |
| 2 $\mu\text{M}$    | 50.15974482                                       | 51.42956348                                      | 119.0294081                                     |
| 0.02 $\mu\text{M}$ | 33.61547263                                       | 37.41657387                                      | 69.89277502                                     |
| 0.02 $\mu\text{M}$ | 30.01666204                                       | 37.41657387                                      | 62.95236294                                     |
| 0.02 $\mu\text{M}$ | 28.58321186                                       | 46.28174586                                      | 61.40032573                                     |
| 0.02 $\mu\text{M}$ | 25.01999201                                       | 37.58989226                                      | 62.00806399                                     |
| 0.02 $\mu\text{M}$ | 30.01666204                                       | 35.91656999                                      | 85.34635317                                     |
| 0.01 $\mu\text{M}$ | 24.59674775                                       | 9.433981132                                      | 69.99285678                                     |
| 0.01 $\mu\text{M}$ | 19.23538406                                       | 9.433981132                                      | 55.30822724                                     |
| 0.01 $\mu\text{M}$ | 23.85372088                                       | 8.062257748                                      | 67.09694479                                     |
| 0.01 $\mu\text{M}$ | 20.49390153                                       | 3.741657387                                      | 63.15061362                                     |
| 0.01 $\mu\text{M}$ | 13.56465997                                       | 7.280109889                                      | 91.46584062                                     |

**Table S9** The training matrix of the colorimetric response patterns against epicatechin 3-gallate with different concentrations (0.01-200  $\mu\text{M}$ ) using this sensor assay.

| antioxidants       | $\Delta\text{RGB-AgNO}_3$<br>(400 $\mu\text{M}$ ) | $\Delta\text{RGB-AgNO}_3$ (40<br>$\mu\text{M}$ ) | $\Delta\text{RGB-AgNO}_3$ (4<br>$\mu\text{M}$ ) |
|--------------------|---------------------------------------------------|--------------------------------------------------|-------------------------------------------------|
| 200 $\mu\text{M}$  | 111.5750868                                       | 140.4919927                                      | 187.1069213                                     |
| 200 $\mu\text{M}$  | 109.2886087                                       | 140.4919927                                      | 181.6067179                                     |
| 200 $\mu\text{M}$  | 103.9278596                                       | 128.7361643                                      | 184.8485867                                     |
| 200 $\mu\text{M}$  | 117.2774488                                       | 147.2888319                                      | 192.0650931                                     |
| 200 $\mu\text{M}$  | 115.2258652                                       | 144.2671134                                      | 186.4966488                                     |
| 100 $\mu\text{M}$  | 93.1557835                                        | 162.7667042                                      | 175.4907405                                     |
| 100 $\mu\text{M}$  | 96.84523736                                       | 162.7667042                                      | 174.2125139                                     |
| 100 $\mu\text{M}$  | 88.14760348                                       | 140.1998573                                      | 172.9913293                                     |
| 100 $\mu\text{M}$  | 99.12113801                                       | 157.0127383                                      | 179.7804216                                     |
| 100 $\mu\text{M}$  | 94.94208761                                       | 152.8953891                                      | 168.0714134                                     |
| 20 $\mu\text{M}$   | 85.00588215                                       | 155.9294712                                      | 141.8344105                                     |
| 20 $\mu\text{M}$   | 86.13361713                                       | 155.9294712                                      | 146.8434541                                     |
| 20 $\mu\text{M}$   | 89.17959408                                       | 146.0342426                                      | 146.9761885                                     |
| 20 $\mu\text{M}$   | 92.20086767                                       | 151.4628667                                      | 146.5469208                                     |
| 20 $\mu\text{M}$   | 86.86195945                                       | 150.6685103                                      | 139.992857                                      |
| 10 $\mu\text{M}$   | 102.3230179                                       | 79.12016178                                      | 90.69178574                                     |
| 10 $\mu\text{M}$   | 105.3043209                                       | 79.12016178                                      | 82.3893197                                      |
| 10 $\mu\text{M}$   | 96.87104831                                       | 69.69935437                                      | 87.8749111                                      |
| 10 $\mu\text{M}$   | 108.4573649                                       | 58.45511098                                      | 82.33468285                                     |
| 10 $\mu\text{M}$   | 102.8542658                                       | 74.22937424                                      | 57.99137867                                     |
| 2 $\mu\text{M}$    | 63.03967005                                       | 111.6691542                                      | 121.1073904                                     |
| 2 $\mu\text{M}$    | 58.92367945                                       | 111.6691542                                      | 120.3079382                                     |
| 2 $\mu\text{M}$    | 58.66856058                                       | 109.658561                                       | 122.5275479                                     |
| 2 $\mu\text{M}$    | 66.06057826                                       | 115.1043005                                      | 120.7849328                                     |
| 2 $\mu\text{M}$    | 52.09606511                                       | 108.6692229                                      | 127.8671185                                     |
| 0.02 $\mu\text{M}$ | 40.36087214                                       | 69.61321714                                      | 133.9925371                                     |
| 0.02 $\mu\text{M}$ | 41.97618372                                       | 69.61321714                                      | 136.8612436                                     |
| 0.02 $\mu\text{M}$ | 42.29657197                                       | 58.22370651                                      | 137.6263056                                     |
| 0.02 $\mu\text{M}$ | 50.60632372                                       | 68.41783393                                      | 136.8612436                                     |
| 0.02 $\mu\text{M}$ | 44.83302354                                       | 63.82789359                                      | 131.1258937                                     |
| 0.01 $\mu\text{M}$ | 12.68857754                                       | 90.03332716                                      | 107.5453393                                     |
| 0.01 $\mu\text{M}$ | 19.26136028                                       | 90.03332716                                      | 102.5962962                                     |
| 0.01 $\mu\text{M}$ | 13.74772708                                       | 89.49860334                                      | 116.9829047                                     |
| 0.01 $\mu\text{M}$ | 14.45683229                                       | 93.8562731                                       | 109.3892134                                     |
| 0.01 $\mu\text{M}$ | 15.26433752                                       | 90.04443348                                      | 108.9495296                                     |



**Table S10** The training matrix of the colorimetric response patterns against epigallocatechin with different concentrations (0.01-200  $\mu\text{M}$ ) using this sensor assay.

| antioxidants       | $\Delta\text{RGB-AgNO}_3$<br>(400 $\mu\text{M}$ ) | $\Delta\text{RGB-AgNO}_3$ (40<br>$\mu\text{M}$ ) | $\Delta\text{RGB-AgNO}_3$ (4<br>$\mu\text{M}$ ) |
|--------------------|---------------------------------------------------|--------------------------------------------------|-------------------------------------------------|
| 200 $\mu\text{M}$  | 126.2418314                                       | 46.96807426                                      | 15.90597372                                     |
| 200 $\mu\text{M}$  | 130.3303495                                       | 46.96807426                                      | 17.94435844                                     |
| 200 $\mu\text{M}$  | 126.2893503                                       | 45.49725266                                      | 17.1464282                                      |
| 200 $\mu\text{M}$  | 126.83848                                         | 48.83646179                                      | 8.831760866                                     |
| 200 $\mu\text{M}$  | 132.9812017                                       | 44.57577818                                      | 18.05547009                                     |
| 100 $\mu\text{M}$  | 110.6752005                                       | 57.44562647                                      | 17.60681686                                     |
| 100 $\mu\text{M}$  | 115.8274579                                       | 57.44562647                                      | 18.16590212                                     |
| 100 $\mu\text{M}$  | 113.3754824                                       | 51.73973328                                      | 20.22374842                                     |
| 100 $\mu\text{M}$  | 114.9391143                                       | 53.52569476                                      | 20.02498439                                     |
| 100 $\mu\text{M}$  | 121.1073904                                       | 47.02127178                                      | 19.67231557                                     |
| 20 $\mu\text{M}$   | 138.8560406                                       | 70.80254233                                      | 36.08323711                                     |
| 20 $\mu\text{M}$   | 137.1495534                                       | 70.80254233                                      | 35.84689666                                     |
| 20 $\mu\text{M}$   | 133.7235955                                       | 75.6174583                                       | 32.44996148                                     |
| 20 $\mu\text{M}$   | 140.4848746                                       | 71.35124386                                      | 32.54228019                                     |
| 20 $\mu\text{M}$   | 140.5631531                                       | 72.36711961                                      | 28.61817604                                     |
| 10 $\mu\text{M}$   | 87.50999943                                       | 108.7474138                                      | 40.01249805                                     |
| 10 $\mu\text{M}$   | 98.59513173                                       | 108.7474138                                      | 37.58989226                                     |
| 10 $\mu\text{M}$   | 90.33825325                                       | 114.074537                                       | 41.73727351                                     |
| 10 $\mu\text{M}$   | 93.26306879                                       | 114.2278425                                      | 32.04684072                                     |
| 10 $\mu\text{M}$   | 92.65527508                                       | 111.0045044                                      | 37.58989226                                     |
| 2 $\mu\text{M}$    | 54.08326913                                       | 137.8695035                                      | 43.30127019                                     |
| 2 $\mu\text{M}$    | 54.64430437                                       | 137.8695035                                      | 37.53664876                                     |
| 2 $\mu\text{M}$    | 58.1893461                                        | 139.5528574                                      | 42.94182111                                     |
| 2 $\mu\text{M}$    | 53.48831648                                       | 137.3389966                                      | 41.56921938                                     |
| 2 $\mu\text{M}$    | 54.41507144                                       | 128.5729365                                      | 38.18376618                                     |
| 0.02 $\mu\text{M}$ | 46.41120554                                       | 134.8851363                                      | 94.46163242                                     |
| 0.02 $\mu\text{M}$ | 50.48762225                                       | 134.8851363                                      | 88.22698                                        |
| 0.02 $\mu\text{M}$ | 50.99019514                                       | 138.267856                                       | 89.28605714                                     |
| 0.02 $\mu\text{M}$ | 54.68089246                                       | 134.2758355                                      | 91.67333309                                     |
| 0.02 $\mu\text{M}$ | 55.80322571                                       | 136.4331338                                      | 90.60905032                                     |
| 0.01 $\mu\text{M}$ | 86.84468896                                       | 163.65207                                        | 122.4744871                                     |
| 0.01 $\mu\text{M}$ | 88.48163651                                       | 163.65207                                        | 112.7696768                                     |
| 0.01 $\mu\text{M}$ | 89.67162316                                       | 166.7033293                                      | 112.7696768                                     |
| 0.01 $\mu\text{M}$ | 94.34511116                                       | 163.3738045                                      | 121.2765435                                     |
| 0.01 $\mu\text{M}$ | 94.28149341                                       | 160.5521722                                      | 112.2051692                                     |

**Table S11** The training matrix of the colorimetric response patterns against epigallocatechin 3-gallate with different concentrations (0.01-200 $\mu$ M) using this sensor assay.

| antioxidants | $\Delta$ RGB-AgNO <sub>3</sub><br>(400 $\mu$ M) | $\Delta$ RGB-AgNO <sub>3</sub> (40<br>$\mu$ M) | $\Delta$ RGB-AgNO <sub>3</sub> (4<br>$\mu$ M) |
|--------------|-------------------------------------------------|------------------------------------------------|-----------------------------------------------|
| 200 $\mu$ M  | 108.6324077                                     | 67.6609193                                     | 106.3437821                                   |
| 200 $\mu$ M  | 104.1201229                                     | 67.6609193                                     | 117.4308307                                   |
| 200 $\mu$ M  | 106.8176015                                     | 67.05967492                                    | 114.952164                                    |
| 200 $\mu$ M  | 110.6842356                                     | 61.29437168                                    | 108.9219904                                   |
| 200 $\mu$ M  | 103.116439                                      | 64.28841264                                    | 110.0999546                                   |
| 100 $\mu$ M  | 91.65696918                                     | 75.1598297                                     | 125.0319959                                   |
| 100 $\mu$ M  | 89.81091248                                     | 75.1598297                                     | 131.91285                                     |
| 100 $\mu$ M  | 86.5909926                                      | 73.19152956                                    | 126.0912368                                   |
| 100 $\mu$ M  | 99.76973489                                     | 79.59899497                                    | 124.3704145                                   |
| 100 $\mu$ M  | 91.65696918                                     | 85.1704174                                     | 126.0039682                                   |
| 20 $\mu$ M   | 78.59389289                                     | 135.900699                                     | 60.73713856                                   |
| 20 $\mu$ M   | 79.55501241                                     | 135.900699                                     | 68.79680225                                   |
| 20 $\mu$ M   | 70.63285355                                     | 130.617763                                     | 62.41794614                                   |
| 20 $\mu$ M   | 73.73601562                                     | 128.4406478                                    | 60.62177826                                   |
| 20 $\mu$ M   | 78.59389289                                     | 127.1573828                                    | 65.39877675                                   |
| 10 $\mu$ M   | 64.76109943                                     | 70.67531394                                    | 81.45550933                                   |
| 10 $\mu$ M   | 63.56099433                                     | 70.67531394                                    | 79.2527602                                    |
| 10 $\mu$ M   | 57.98275606                                     | 69.18814927                                    | 72.2564876                                    |
| 10 $\mu$ M   | 60.94259594                                     | 66.64082833                                    | 79.72452571                                   |
| 10 $\mu$ M   | 58.70264049                                     | 73.76313442                                    | 69.8641539                                    |
| 2 $\mu$ M    | 64.60650122                                     | 63.15061362                                    | 36.45545227                                   |
| 2 $\mu$ M    | 63.11893535                                     | 63.15061362                                    | 35.44009029                                   |
| 2 $\mu$ M    | 63.75735252                                     | 62.28964601                                    | 33.2565783                                    |
| 2 $\mu$ M    | 64.04685785                                     | 51.07837116                                    | 29.08607914                                   |
| 2 $\mu$ M    | 66.46803743                                     | 53.30103188                                    | 27                                            |
| 0.02 $\mu$ M | 17.02938637                                     | 60.76183012                                    | 87.21238444                                   |
| 0.02 $\mu$ M | 12.08304597                                     | 60.76183012                                    | 89.0056178                                    |
| 0.02 $\mu$ M | 17.74823935                                     | 53.31978995                                    | 91.79324594                                   |
| 0.02 $\mu$ M | 17.4642492                                      | 53.71219601                                    | 98.98484733                                   |
| 0.02 $\mu$ M | 14.28285686                                     | 55.26300752                                    | 95.69743988                                   |
| 0.01 $\mu$ M | 23.15167381                                     | 20.1246118                                     | 23.72762104                                   |
| 0.01 $\mu$ M | 23.85372088                                     | 20.1246118                                     | 36.24913792                                   |
| 0.01 $\mu$ M | 17.49285568                                     | 21.30727575                                    | 25.29822128                                   |
| 0.01 $\mu$ M | 25.3179778                                      | 24.75883681                                    | 31.1608729                                    |
| 0.01 $\mu$ M | 19.10497317                                     | 37.65634077                                    | 29.563491                                     |

**Table S12** The training matrix of the colorimetric response patterns against gallic catechin with different concentrations (0.01-200  $\mu\text{M}$ ) using this sensor assay.

| antioxidants       | $\Delta\text{RGB-AgNO}_3$<br>(400 $\mu\text{M}$ ) | $\Delta\text{RGB-AgNO}_3$ (40<br>$\mu\text{M}$ ) | $\Delta\text{RGB-AgNO}_3$ (4<br>$\mu\text{M}$ ) |
|--------------------|---------------------------------------------------|--------------------------------------------------|-------------------------------------------------|
| 200 $\mu\text{M}$  | 91.21951546                                       | 79.98749902                                      | 19.6468827                                      |
| 200 $\mu\text{M}$  | 90.36038955                                       | 79.98749902                                      | 21.47091055                                     |
| 200 $\mu\text{M}$  | 95.65040512                                       | 73.52550578                                      | 33.82306905                                     |
| 200 $\mu\text{M}$  | 92.28217596                                       | 77.58221446                                      | 26.38181192                                     |
| 200 $\mu\text{M}$  | 91.58602513                                       | 63.31666447                                      | 11.18033989                                     |
| 100 $\mu\text{M}$  | 87.869221                                         | 76.74633542                                      | 45.32107677                                     |
| 100 $\mu\text{M}$  | 89.69949833                                       | 76.74633542                                      | 47.21228654                                     |
| 100 $\mu\text{M}$  | 94.94208761                                       | 70.32780389                                      | 58.15496539                                     |
| 100 $\mu\text{M}$  | 83.10234654                                       | 40.21193853                                      | 19.72308292                                     |
| 100 $\mu\text{M}$  | 90.43782395                                       | 65.21502894                                      | 40.16217126                                     |
| 20 $\mu\text{M}$   | 67.45368782                                       | 60.24948133                                      | 53.19774431                                     |
| 20 $\mu\text{M}$   | 71.42828571                                       | 60.24948133                                      | 61.20457499                                     |
| 20 $\mu\text{M}$   | 70.61161378                                       | 50.3189825                                       | 73.73601562                                     |
| 20 $\mu\text{M}$   | 68.65857558                                       | 42.62628297                                      | 58.5918083                                      |
| 20 $\mu\text{M}$   | 70.61161378                                       | 43.11612227                                      | 53.42284156                                     |
| 10 $\mu\text{M}$   | 61.32699243                                       | 83.3126641                                       | 79.78721702                                     |
| 10 $\mu\text{M}$   | 65.98484675                                       | 83.3126641                                       | 92.37965144                                     |
| 10 $\mu\text{M}$   | 66.21933252                                       | 74.97332859                                      | 102.3181313                                     |
| 10 $\mu\text{M}$   | 60.67948583                                       | 76.15773106                                      | 91.87491497                                     |
| 10 $\mu\text{M}$   | 62.63385666                                       | 73.10950691                                      | 86.82165628                                     |
| 2 $\mu\text{M}$    | 39.73663297                                       | 48.20788317                                      | 43.78355856                                     |
| 2 $\mu\text{M}$    | 47.33920151                                       | 48.20788317                                      | 52.81098371                                     |
| 2 $\mu\text{M}$    | 47.01063709                                       | 42.86023798                                      | 55.01817881                                     |
| 2 $\mu\text{M}$    | 42.36744033                                       | 46.17358552                                      | 51.66236541                                     |
| 2 $\mu\text{M}$    | 43.11612227                                       | 33.76388603                                      | 41.78516483                                     |
| 0.02 $\mu\text{M}$ | 23.62202362                                       | 22.11334439                                      | 33.54101966                                     |
| 0.02 $\mu\text{M}$ | 23.51595203                                       | 22.11334439                                      | 39.05124838                                     |
| 0.02 $\mu\text{M}$ | 25.47547841                                       | 24.61706725                                      | 39.11521443                                     |
| 0.02 $\mu\text{M}$ | 19.4422221                                        | 24                                               | 37.17526059                                     |
| 0.02 $\mu\text{M}$ | 20.61552813                                       | 14.03566885                                      | 23.76972865                                     |
| 0.01 $\mu\text{M}$ | 13.92838828                                       | 4.472135955                                      | 92.74696761                                     |
| 0.01 $\mu\text{M}$ | 10.81665383                                       | 4.472135955                                      | 97.28309206                                     |
| 0.01 $\mu\text{M}$ | 10.19803903                                       | 15.26433752                                      | 98.16312953                                     |
| 0.01 $\mu\text{M}$ | 13.49073756                                       | 12.68857754                                      | 93                                              |
| 0.01 $\mu\text{M}$ | 14.45683229                                       | 7.348469228                                      | 82.23138087                                     |

**Table S13** The training matrix of the colorimetric response patterns against 6 analytes with different concentrations using this sensor assay.

| antioxidants             | $\Delta\text{RGB-AgNO}_3$<br>(400 $\mu\text{M}$ ) | $\Delta\text{RGB-AgNO}_3$ (40<br>$\mu\text{M}$ ) | $\Delta\text{RGB-AgNO}_3$ (4<br>$\mu\text{M}$ ) |
|--------------------------|---------------------------------------------------|--------------------------------------------------|-------------------------------------------------|
| EC(200 $\mu\text{M}$ )   | 116.2                                             | 80.1                                             | 95.12                                           |
| EC(200 $\mu\text{M}$ )   | 114.49                                            | 80.1                                             | 75.5                                            |
| EC(200 $\mu\text{M}$ )   | 112.08                                            | 87.96                                            | 89.54                                           |
| EC(200 $\mu\text{M}$ )   | 111.19                                            | 82.66                                            | 84.12                                           |
| EC(200 $\mu\text{M}$ )   | 111.09                                            | 80.1                                             | 110.17                                          |
| EC(100 $\mu\text{M}$ )   | 90.48                                             | 101.05                                           | 129.73                                          |
| EC(100 $\mu\text{M}$ )   | 85.52                                             | 101.05                                           | 113.8                                           |
| EC(100 $\mu\text{M}$ )   | 93.4                                              | 102.06                                           | 123.07                                          |
| EC(100 $\mu\text{M}$ )   | 88.75                                             | 91.83                                            | 120.69                                          |
| EC(100 $\mu\text{M}$ )   | 92.14                                             | 91.32                                            | 152.62                                          |
| EC(0.2 $\mu\text{M}$ )   | 33.62                                             | 37.42                                            | 69.89                                           |
| EC(0.2 $\mu\text{M}$ )   | 30.02                                             | 37.42                                            | 62.95                                           |
| EC(0.2 $\mu\text{M}$ )   | 28.58                                             | 46.28                                            | 61.4                                            |
| EC(0.2 $\mu\text{M}$ )   | 25.02                                             | 37.59                                            | 62.01                                           |
| EC(0.2 $\mu\text{M}$ )   | 30.02                                             | 35.92                                            | 85.35                                           |
| C(10 $\mu\text{M}$ )     | 63.33                                             | 17.61                                            | 41.88                                           |
| C(10 $\mu\text{M}$ )     | 59.5                                              | 17.61                                            | 31.26                                           |
| C(10 $\mu\text{M}$ )     | 66.36                                             | 18.81                                            | 35.52                                           |
| C(10 $\mu\text{M}$ )     | 61.13                                             | 18                                               | 29.6                                            |
| C(10 $\mu\text{M}$ )     | 63.82                                             | 24.39                                            | 31.84                                           |
| C(0.01 $\mu\text{M}$ )   | 18.38                                             | 19.42                                            | 15.84                                           |
| C(0.01 $\mu\text{M}$ )   | 7.35                                              | 19.42                                            | 25.5                                            |
| C(0.01 $\mu\text{M}$ )   | 18.63                                             | 16.03                                            | 22.56                                           |
| C(0.01 $\mu\text{M}$ )   | 17.58                                             | 21.93                                            | 22.52                                           |
| C(0.01 $\mu\text{M}$ )   | 19.52                                             | 25.32                                            | 17.38                                           |
| ECG(200 $\mu\text{M}$ )  | 111.58                                            | 140.49                                           | 187.11                                          |
| ECG(200 $\mu\text{M}$ )  | 109.29                                            | 140.49                                           | 181.61                                          |
| ECG(200 $\mu\text{M}$ )  | 103.93                                            | 128.74                                           | 184.85                                          |
| ECG(200 $\mu\text{M}$ )  | 117.28                                            | 147.29                                           | 192.07                                          |
| ECG(200 $\mu\text{M}$ )  | 115.23                                            | 144.27                                           | 186.5                                           |
| ECG(0.2 $\mu\text{M}$ )  | 40.36                                             | 69.61                                            | 133.99                                          |
| ECG(0.2 $\mu\text{M}$ )  | 41.98                                             | 69.61                                            | 136.86                                          |
| ECG(0.2 $\mu\text{M}$ )  | 42.3                                              | 58.22                                            | 137.63                                          |
| ECG(0.2 $\mu\text{M}$ )  | 50.61                                             | 68.42                                            | 136.86                                          |
| ECG(0.2 $\mu\text{M}$ )  | 44.83                                             | 63.83                                            | 131.13                                          |
| ECG(0.01 $\mu\text{M}$ ) | 12.69                                             | 90.03                                            | 107.55                                          |
| ECG(0.01 $\mu\text{M}$ ) | 19.26                                             | 90.03                                            | 102.6                                           |
| ECG(0.01 $\mu\text{M}$ ) | 13.75                                             | 89.5                                             | 116.98                                          |
| ECG(0.01 $\mu\text{M}$ ) | 14.46                                             | 93.86                                            | 109.39                                          |

|                   |        |        |        |
|-------------------|--------|--------|--------|
| ECG(0.01 $\mu$ M) | 15.26  | 90.04  | 108.95 |
| EGCG(0.2 $\mu$ M) | 17.03  | 60.76  | 87.21  |
| EGCG(0.2 $\mu$ M) | 12.08  | 60.76  | 89.01  |
| EGCG(0.2 $\mu$ M) | 17.75  | 53.32  | 91.79  |
| EGCG(0.2 $\mu$ M) | 17.46  | 53.71  | 98.98  |
| EGCG(0.2 $\mu$ M) | 14.28  | 55.26  | 95.7   |
| GC(200 $\mu$ M)   | 91.22  | 79.99  | 19.65  |
| GC(200 $\mu$ M)   | 90.36  | 79.99  | 21.47  |
| GC(200 $\mu$ M)   | 95.65  | 73.53  | 33.82  |
| GC(200 $\mu$ M)   | 92.28  | 77.58  | 26.38  |
| GC(200 $\mu$ M)   | 91.59  | 63.32  | 11.18  |
| GC(20 $\mu$ M)    | 67.45  | 60.25  | 53.2   |
| GC(20 $\mu$ M)    | 71.43  | 60.25  | 61.2   |
| GC(20 $\mu$ M)    | 70.61  | 50.32  | 73.74  |
| GC(20 $\mu$ M)    | 68.66  | 42.63  | 58.59  |
| GC(20 $\mu$ M)    | 70.61  | 43.12  | 53.42  |
| GC(10 $\mu$ M)    | 61.33  | 83.31  | 79.79  |
| GC(10 $\mu$ M)    | 65.98  | 83.31  | 92.38  |
| GC(10 $\mu$ M)    | 66.22  | 74.97  | 102.32 |
| GC(10 $\mu$ M)    | 60.68  | 76.16  | 91.87  |
| GC(10 $\mu$ M)    | 62.63  | 73.11  | 86.82  |
| GC(2 $\mu$ M)     | 39.74  | 48.21  | 43.78  |
| GC(2 $\mu$ M)     | 47.34  | 48.21  | 52.81  |
| GC(2 $\mu$ M)     | 47.01  | 42.86  | 55.02  |
| GC(2 $\mu$ M)     | 42.37  | 46.17  | 51.66  |
| GC(2 $\mu$ M)     | 43.12  | 33.76  | 41.79  |
| GC(0.01 $\mu$ M)  | 13.93  | 4.47   | 92.75  |
| GC(0.01 $\mu$ M)  | 10.82  | 4.47   | 97.28  |
| GC(0.01 $\mu$ M)  | 10.2   | 15.26  | 98.16  |
| GC(0.01 $\mu$ M)  | 13.49  | 12.69  | 93     |
| GC(0.01 $\mu$ M)  | 14.46  | 7.35   | 82.23  |
| EGC(100 $\mu$ M)  | 110.68 | 57.45  | 17.61  |
| EGC(100 $\mu$ M)  | 115.83 | 57.45  | 18.17  |
| EGC(100 $\mu$ M)  | 113.38 | 51.74  | 20.22  |
| EGC(100 $\mu$ M)  | 114.94 | 53.53  | 20.02  |
| EGC(100 $\mu$ M)  | 121.11 | 47.02  | 19.67  |
| EGC(20 $\mu$ M)   | 138.86 | 70.8   | 36.08  |
| EGC(20 $\mu$ M)   | 137.15 | 70.8   | 35.85  |
| EGC(20 $\mu$ M)   | 133.72 | 75.62  | 32.45  |
| EGC(20 $\mu$ M)   | 140.48 | 71.35  | 32.54  |
| EGC(20 $\mu$ M)   | 140.56 | 72.37  | 28.62  |
| EGC(2 $\mu$ M)    | 54.08  | 137.87 | 43.3   |
| EGC(2 $\mu$ M)    | 54.64  | 137.87 | 37.54  |
| EGC(2 $\mu$ M)    | 58.19  | 139.55 | 42.94  |

---

|                  |       |        |       |
|------------------|-------|--------|-------|
| EGC(2 $\mu$ M)   | 53.49 | 137.34 | 41.57 |
| EGC(2 $\mu$ M)   | 54.42 | 128.57 | 38.18 |
| EGC(0.2 $\mu$ M) | 46.41 | 134.89 | 94.46 |
| EGC(0.2 $\mu$ M) | 50.49 | 134.89 | 88.23 |
| EGC(0.2 $\mu$ M) | 50.99 | 138.27 | 89.29 |
| EGC(0.2 $\mu$ M) | 54.68 | 134.28 | 91.67 |
| EGC(0.2 $\mu$ M) | 55.8  | 136.43 | 90.61 |

---

**Table S14.** The training matrix of the colorimetric response patterns against the mixture of GC and EGC at 20  $\mu\text{M}$  and 0.2  $\mu\text{M}$  using this sensor assay.

| antioxidants | $\Delta\text{RGB-AgNO}_3$<br>(400 $\mu\text{M}$ ) | $\Delta\text{RGB-AgNO}_3$ (40<br>$\mu\text{M}$ ) | $\Delta\text{RGB-AgNO}_3$<br>(4 $\mu\text{M}$ ) |
|--------------|---------------------------------------------------|--------------------------------------------------|-------------------------------------------------|
| GC/EGC=1:9   | 62.46551048                                       | 107.4598995                                      | 140.0374236                                     |
| GC/EGC=1:9   | 63.08002854                                       | 107.4598995                                      | 138.4725244                                     |
| GC/EGC=1:9   | 66.33226967                                       | 114.916709                                       | 137.217528                                      |
| GC/EGC=1:9   | 69.8307955                                        | 115.3015178                                      | 142.2319233                                     |
| GC/EGC=1:9   | 65.11843057                                       | 112.6819418                                      | 143.8778301                                     |
| GC/EGC=2:8   | 56.17437138                                       | 96.76734987                                      | 122.4169923                                     |
| GC/EGC=2:8   | 56.28818704                                       | 96.76734987                                      | 119.8180287                                     |
| GC/EGC=2:8   | 59.07182069                                       | 103.3489236                                      | 120.2339386                                     |
| GC/EGC=2:8   | 60.73713856                                       | 106.4543094                                      | 124.6588946                                     |
| GC/EGC=2:8   | 58.2360713                                        | 100.4832324                                      | 124.2582794                                     |
| GC/EGC=3:7   | 46.5602835                                        | 86.08060176                                      | 104.7965648                                     |
| GC/EGC=3:7   | 46.13686162                                       | 86.08060176                                      | 102.4800468                                     |
| GC/EGC=3:7   | 45.46911039                                       | 91.80114378                                      | 103.2504237                                     |
| GC/EGC=3:7   | 49.8117456                                        | 94.91322353                                      | 107.2001866                                     |
| GC/EGC=3:7   | 47.2687                                           | 89.17337046                                      | 103.6659057                                     |
| GC/EGC=4:6   | 47.06208665                                       | 85.68243694                                      | 97.53194349                                     |
| GC/EGC=4:6   | 46.22812996                                       | 85.68243694                                      | 92.85709451                                     |
| GC/EGC=4:6   | 48.06162711                                       | 90.57814306                                      | 96.62090871                                     |
| GC/EGC=4:6   | 49.76183276                                       | 93.68393672                                      | 98.72426247                                     |
| GC/EGC=4:6   | 47.98708159                                       | 86.36851278                                      | 95.36708027                                     |
| GC           | 21.56385865                                       | 52.47856705                                      | 23.15167381                                     |
| GC           | 18.78829423                                       | 52.47856705                                      | 12.20655562                                     |
| GC           | 18.02775638                                       | 52.84884105                                      | 26.01922366                                     |
| GC           | 16.15549442                                       | 55.50675635                                      | 13.92838828                                     |
| GC           | 20.24845673                                       | 44.24929378                                      | 9.110433579                                     |
| EGC          | 65.38348415                                       | 107.856386                                       | 147.3091986                                     |
| EGC          | 66.46803743                                       | 107.856386                                       | 146.7821515                                     |
| EGC          | 70.1997151                                        | 114.5905755                                      | 143.8540927                                     |
| EGC          | 79.33473388                                       | 119.235062                                       | 155.4027027                                     |
| EGC          | 68.62215386                                       | 114.6123903                                      | 153.1535178                                     |
| GC/EGC=6:4   | 26.20992179                                       | 89.16523986                                      | 145.4786582                                     |
| GC/EGC=6:4   | 26.58571045                                       | 89.16523986                                      | 145.3753762                                     |
| GC/EGC=6:4   | 28.21276307                                       | 94.44363398                                      | 144.1037127                                     |
| GC/EGC=6:4   | 30.03065101                                       | 91.48770409                                      | 142.059565                                      |
| GC/EGC=6:4   | 26.272419                                         | 88.15917422                                      | 139.4179328                                     |
| GC/EGC=7:3   | 21.16341182                                       | 90.66090668                                      | 150.7138348                                     |
| GC/EGC=7:3   | 21.06893448                                       | 90.66090668                                      | 154.0271405                                     |
| GC/EGC=7:3   | 21.88812463                                       | 91.94563611                                      | 150.217742                                      |

---

|            |             |             |             |
|------------|-------------|-------------|-------------|
| GC/EGC=7:3 | 24.27035228 | 92.81734752 | 147.5958333 |
| GC/EGC=7:3 | 18.41195264 | 90.66476714 | 148.3441944 |
| GC/EGC=9:1 | 20.63976744 | 101.5293061 | 171.5470198 |
| GC/EGC=9:1 | 22.89759813 | 101.5293061 | 174.9839993 |
| GC/EGC=9:1 | 21.35907301 | 105.7270542 | 169.7796513 |
| GC/EGC=9:1 | 23.38482414 | 103.7636738 | 168.8880398 |
| GC/EGC=9:1 | 21.76465024 | 100.7032274 | 168.5973309 |
| GC         | 19.74841766 | 105.2663289 | 180.047216  |
| GC         | 21.47091055 | 105.2663289 | 184.6808057 |
| GC         | 19.41648784 | 110.5531546 | 177.8623063 |
| GC         | 22.22611077 | 108.78419   | 177.8623063 |
| GC         | 20.97617696 | 104.885652  | 177.3865835 |
| EGC        | 36.06937759 | 67.91906949 | 95.1052049  |
| EGC        | 36.06937759 | 67.91906949 | 93.90953093 |
| EGC        | 39.11521443 | 70.29224708 | 97.12878049 |
| EGC        | 41.79712909 | 66.96267617 | 89.25245095 |
| EGC        | 34.38022688 | 63.09516622 | 81.64557551 |

---





**Table S15.** The training matrix of the colorimetric response patterns against the mixture of GC, EGC and ECG at 200  $\mu\text{M}$  and 2  $\mu\text{M}$  using this sensor assay.

| antioxidants     | $\Delta\text{RGB-AgNO}_3$<br>(400 $\mu\text{M}$ ) | $\Delta\text{RGB-AgNO}_3$ (40<br>$\mu\text{M}$ ) | $\Delta\text{RGB-AgNO}_3$<br>(4 $\mu\text{M}$ ) |
|------------------|---------------------------------------------------|--------------------------------------------------|-------------------------------------------------|
| GC/EGC/ECG=4:3:3 | 34.2773978                                        | 32.74278546                                      | 61.50398361                                     |
| GC/EGC/ECG=4:3:3 | 34.79166567                                       | 32.74278546                                      | 59.76462164                                     |
| GC/EGC/ECG=4:3:3 | 33.46923961                                       | 37.839926                                        | 61.21935968                                     |
| GC/EGC/ECG=4:3:3 | 35.50112674                                       | 31.88792875                                      | 57.54980452                                     |
| GC/EGC/ECG=4:3:3 | 34.78850385                                       | 33.70489579                                      | 46.10075921                                     |
| GC/EGC/ECG=3:4:3 | 36.84901627                                       | 27.93760906                                      | 58.60563113                                     |
| GC/EGC/ECG=3:4:3 | 37.34876169                                       | 27.93760906                                      | 57.74192584                                     |
| GC/EGC/ECG=3:4:3 | 40.21193853                                       | 31.84729188                                      | 58.6018771                                      |
| GC/EGC/ECG=3:4:3 | 39.571328                                         | 25.292489                                        | 52.97348393                                     |
| GC/EGC/ECG=3:4:3 | 37.40668389                                       | 29.24534151                                      | 44.34106449                                     |
| GC               | 29.73213749                                       | 67.42403132                                      | 171.5470198                                     |
| GC               | 29.73213749                                       | 67.42403132                                      | 174.9839993                                     |
| GC               | 27.47726333                                       | 73.74279626                                      | 169.7796513                                     |
| GC               | 33.54101966                                       | 70.9506871                                       | 168.8880398                                     |
| GC               | 30.95157508                                       | 65.06919394                                      | 168.5973309                                     |
| EGC              | 55.03635162                                       | 37.22902094                                      | 44.77722635                                     |
| EGC              | 55.03635162                                       | 37.22902094                                      | 49.40647731                                     |
| EGC              | 55.53377351                                       | 36.29049462                                      | 48.11444689                                     |
| EGC              | 55.78530272                                       | 37.69615365                                      | 42.55584566                                     |
| EGC              | 56.70978752                                       | 35.14256678                                      | 46.8508271                                      |
| ECG              | 22.20360331                                       | 25.63201124                                      | 61.97580173                                     |
| ECG              | 23.17326045                                       | 25.63201124                                      | 57.02630972                                     |
| ECG              | 21.61018278                                       | 30.47950131                                      | 57.00877125                                     |
| ECG              | 25.88435821                                       | 9.433981132                                      | 51.92301994                                     |
| ECG              | 20                                                | 28.65309756                                      | 35.48239                                        |
| GC/EGC/ECG=2:4:4 | 31.9077044                                        | 26.88262636                                      | 56.4272062                                      |
| GC/EGC/ECG=2:4:4 | 32.44198514                                       | 26.88262636                                      | 55.02181749                                     |
| GC/EGC/ECG=2:4:4 | 31.33342624                                       | 29.17498929                                      | 56.03577786                                     |
| GC/EGC/ECG=2:4:4 | 34.78731953                                       | 23.20954976                                      | 50.43323904                                     |
| GC/EGC/ECG=2:4:4 | 32.33910327                                       | 28.13824444                                      | 44.80130355                                     |
| GC/EGC/ECG=4:4:2 | 27.4149886                                        | 23.59736426                                      | 51.26236046                                     |
| GC/EGC/ECG=4:4:2 | 27.88910899                                       | 23.59736426                                      | 49.88587375                                     |
| GC/EGC/ECG=4:4:2 | 27.04114643                                       | 28.12177804                                      | 50.87247193                                     |
| GC/EGC/ECG=4:4:2 | 30.23040853                                       | 20.10381058                                      | 45.31480553                                     |
| GC/EGC/ECG=4:4:2 | 27.92020057                                       | 24.72166661                                      | 35.77679695                                     |
| GC/EGC=9:1       | 20.63976744                                       | 101.5293061                                      | 171.5470198                                     |
| GC/EGC=9:1       | 22.89759813                                       | 101.5293061                                      | 174.9839993                                     |
| GC/EGC=9:1       | 21.35907301                                       | 105.7270542                                      | 169.7796513                                     |

---

|            |             |             |             |
|------------|-------------|-------------|-------------|
| GC/EGC=9:1 | 23.38482414 | 103.7636738 | 168.8880398 |
| GC/EGC=9:1 | 21.76465024 | 100.7032274 | 168.5973309 |
| GC         | 12.88409873 | 77.95511529 | 169.8705389 |
| GC         | 0           | 77.95511529 | 162.6437825 |
| GC         | 7.549834435 | 94.20721841 | 166.0271062 |
| GC         | 4.472135955 | 84.90583019 | 166.0271062 |
| GC         | 4.898979486 | 77.95511529 | 159.5650338 |
| EGC        | 32.87856445 | 82.83718972 | 113.4680572 |
| EGC        | 30.69201851 | 82.83718972 | 123.1503147 |
| EGC        | 31.70173497 | 94.78396489 | 116.7775663 |
| EGC        | 33.74907406 | 86.49277426 | 119.7747887 |
| EGC        | 30.88689042 | 86.49277426 | 112.1918001 |
| ECG        | 28.39013913 | 70.85901495 | 148.492424  |
| ECG        | 27.80287755 | 70.85901495 | 145.6639969 |
| ECG        | 28.3019434  | 78.84161338 | 153.1176019 |
| ECG        | 23.62202362 | 75.81556568 | 154.0746572 |
| ECG        | 34.88552709 | 77.89736838 | 148.3441944 |

---

**Table S16.** The training matrix of the colorimetric response patterns against the 6 analytes at 2  $\mu\text{M}$  with tannic acid(TA) and gallic acid(GA) at 200 $\mu\text{M}$  as potential interferences using this sensor assay.

| antioxidants | $\Delta\text{RGB-AgNO}_3$<br>(400 $\mu\text{M}$ ) | $\Delta\text{RGB-AgNO}_3$<br>(40 $\mu\text{M}$ ) | $\Delta\text{RGB-AgNO}_3$<br>(4 $\mu\text{M}$ ) |
|--------------|---------------------------------------------------|--------------------------------------------------|-------------------------------------------------|
| C            | 11.5758369                                        | 93.62691921                                      | 83.36066219                                     |
| C            | 15.16575089                                       | 93.62691921                                      | 79.93122043                                     |
| C            | 10.77032961                                       | 98.23441352                                      | 86.79285685                                     |
| C            | 5.196152423                                       | 102.3181313                                      | 81.64557551                                     |
| C            | 4.123105626                                       | 102.3181313                                      | 91.79324594                                     |
| EC           | 27.09243437                                       | 113.2519316                                      | 130.8778056                                     |
| EC           | 29.03446228                                       | 113.2519316                                      | 134.3167897                                     |
| EC           | 20.0748599                                        | 122.0368797                                      | 136.0367597                                     |
| EC           | 25.03996805                                       | 118.14398                                        | 136.7077174                                     |
| EC           | 21.63330765                                       | 119.8707637                                      | 138.426876                                      |
| GC           | 31.78049716                                       | 115.1824639                                      | 139.9499911                                     |
| GC           | 38.60051813                                       | 115.1824639                                      | 141.665098                                      |
| GC           | 28.39013913                                       | 126.1824076                                      | 139.9499911                                     |
| GC           | 29.84962311                                       | 118.8402289                                      | 138.2353066                                     |
| GC           | 29.84962311                                       | 122.2906374                                      | 148.5294584                                     |
| EGC          | 47.16990566                                       | 77.99358948                                      | 54.88169094                                     |
| EGC          | 52.32590181                                       | 77.99358948                                      | 50.76416059                                     |
| EGC          | 47.16990566                                       | 86.07554821                                      | 59.01694672                                     |
| EGC          | 48.88762625                                       | 77.05193054                                      | 49.2138192                                      |
| EGC          | 42.72001873                                       | 80.50465825                                      | 51.8748494                                      |
| EGCG         | 39.37003937                                       | 99.54898292                                      | 86.44073114                                     |
| EGCG         | 39.37003937                                       | 99.54898292                                      | 93.29523032                                     |
| EGCG         | 35.86084215                                       | 111.1035553                                      | 91.9782583                                      |
| EGCG         | 35.86084215                                       | 100.3244736                                      | 92.62289134                                     |
| EGCG         | 34.10278581                                       | 107.2240645                                      | 100.0099995                                     |
| ECG          | 14.73091986                                       | 108.0601684                                      | 73.60706488                                     |
| ECG          | 19.54482029                                       | 108.0601684                                      | 78.5684415                                      |
| ECG          | 16.673332                                         | 112.9291813                                      | 78.74642849                                     |
| ECG          | 15.39480432                                       | 105.6314347                                      | 76.5049018                                      |
| ECG          | 11.70469991                                       | 115.8533556                                      | 80.28698525                                     |
| GA           | 55.31726674                                       | 111.4271062                                      | 171.5470198                                     |
| GA           | 59.53990259                                       | 111.4271062                                      | 174.9839993                                     |
| GA           | 52.03844733                                       | 123.1340733                                      | 169.7796513                                     |
| GA           | 55.15432893                                       | 106.2873464                                      | 168.8880398                                     |
| GA           | 53.82378656                                       | 125.1678873                                      | 168.5973309                                     |
| TA           | 42.62628297                                       | 102.1665307                                      | 95.90099061                                     |
| TA           | 44.04543109                                       | 102.1665307                                      | 89.02246907                                     |

---

|    |             |             |             |
|----|-------------|-------------|-------------|
| TA | 42.42640687 | 105.3612832 | 99.57409302 |
| TA | 42.08325083 | 106.7005155 | 91.92388155 |
| TA | 43.15089802 | 104.7425415 | 105.3850084 |

---

**Table S17.** The training matrix of the colorimetric response patterns against the 6 analytes at 0.02  $\mu\text{M}$  in serum samples using this sensor assay.

| antioxidants | $\Delta\text{RGB-AgNO}_3$<br>(400 $\mu\text{M}$ ) | $\Delta\text{RGB-AgNO}_3$ (40<br>$\mu\text{M}$ ) | $\Delta\text{RGB-AgNO}_3$ (4<br>$\mu\text{M}$ ) |
|--------------|---------------------------------------------------|--------------------------------------------------|-------------------------------------------------|
| C            | 30.08321791                                       | 30.03331484                                      | 100.9455299                                     |
| C            | 32.07802986                                       | 30.03331484                                      | 98.31073187                                     |
| C            | 30.90307428                                       | 37.20215048                                      | 105.5461984                                     |
| C            | 37.20215048                                       | 32.80243893                                      | 109.6403211                                     |
| C            | 31.25699922                                       | 31.52776554                                      | 109.6540013                                     |
| EC           | 46.38965402                                       | 47.16990566                                      | 167.9136683                                     |
| EC           | 50.40833264                                       | 47.16990566                                      | 168.7424072                                     |
| EC           | 49.93996396                                       | 49.58830507                                      | 175.3567792                                     |
| EC           | 49.28488612                                       | 45.39823785                                      | 175.068558                                      |
| EC           | 43.46262762                                       | 48.83646179                                      | 174.292857                                      |
| GC           | 55.25395913                                       | 48.36320916                                      | 111.8570516                                     |
| GC           | 60.28266749                                       | 48.36320916                                      | 111.5123312                                     |
| GC           | 59.9082632                                        | 57.02630972                                      | 113.6177803                                     |
| GC           | 61.53048025                                       | 58.01723882                                      | 127.667537                                      |
| GC           | 56.29387178                                       | 55.31726674                                      | 123.6567831                                     |
| EGC          | 26.0959767                                        | 63.38769597                                      | 111.8793994                                     |
| EGC          | 24.37211521                                       | 63.38769597                                      | 99.70456359                                     |
| EGC          | 28.70540019                                       | 71.19691005                                      | 107.5685828                                     |
| EGC          | 32.69556545                                       | 61.97580173                                      | 120.4574614                                     |
| EGC          | 26.77685568                                       | 63.60817558                                      | 112.0223192                                     |
| EGCG         | 28.0713377                                        | 24.06241883                                      | 133.4203882                                     |
| EGCG         | 26.2488095                                        | 24.06241883                                      | 129.2826361                                     |
| EGCG         | 30.49590136                                       | 27.76688675                                      | 135.3292282                                     |
| EGCG         | 30.43024811                                       | 19.26136028                                      | 134.8517705                                     |
| EGCG         | 27.12931993                                       | 21.30727575                                      | 140.6591625                                     |
| ECG          | 34.4818793                                        | 36.02776707                                      | 129.3406355                                     |
| ECG          | 36.02776707                                       | 36.02776707                                      | 132.1135875                                     |
| ECG          | 39.8246155                                        | 30.47950131                                      | 134.2907294                                     |
| ECG          | 43.05810028                                       | 31.27299154                                      | 133.8394561                                     |
| ECG          | 38.52272057                                       | 33.86738844                                      | 135.9816164                                     |
| control      | 22.3159136                                        | 33.30165161                                      | 15.26433752                                     |
| control      | 28.14249456                                       | 33.30165161                                      | 11.78982612                                     |
| control      | 32.58834147                                       | 21.9544984                                       | 22.75961335                                     |
| control      | 28.14249456                                       | 19.31320792                                      | 12.36931688                                     |
| control      | 19.5192213                                        | 34.78505426                                      | 14.35270009                                     |
